# Supplementary material for: Hypoglycemia Prevention and User Acceptance of an Insulin Pump System with Predictive Low Glucose Management
Source: PubMed Central journal article supplement — Diabetes Technol Ther. 2016 May 1;18(5):288–91. doi: 10.1089/dia.2015.0324 (PMC4870649; doi:10.1089/dia.2015.0324), 2016-05-01
Supplement: Supp_Table1.pdf [file Supp_Table1.pdf]

## Supplementary Data

SUPPLEMENTARY TABLE S1. END-OF-STUDY QUESTIONNAIRE RESULTS

| Question                                                                                                                 | Adult |      |        |       |             | Pediatric |      |        |       |             |
|--------------------------------------------------------------------------------------------------------------------------|-------|------|--------|-------|-------------|-----------|------|--------|-------|-------------|
|                                                                                                                          | Mean  | SD   | Median | Range | ≥4          | Mean      | SD   | Median | Range | ≥4          |
| The Suspend by Sensor features are easy to use.                                                                          | 6.4   | 0.59 | 6      | 5–7   | 23 (100.0%) | 6.2       | 0.83 | 6      | 4–7   | 16 (100.0%) |
| It is easy to modify the Low Settings on this pump.                                                                      | 6     | 0.82 | 6      | 4–7   | 23 (100.0%) | 5.6       | 1.03 | 6      | 4–7   | 16 (100.0%) |
| It is easy to understand what my sensor glucose value is at any time.                                                    | 6.5   | 0.85 | 7      | 4–7   | 23 (100.0%) | 6.9       | 0.34 | 7      | 6–7   | 16 (100.0%) |
| I trust the sensor glucose readings displayed on this pump.                                                              | 5.5   | 1.16 | 6      | 3–7   | 21 (91.3%)  | 5.8       | 0.91 | 6      | 4–7   | 16 (100.0%) |
| I received only the relevant alerts I wanted.                                                                            | 5.4   | 1.27 | 5      | 3–7   | 20 (87.0%)  | 4.5       | 1.59 | 5      | 2–7   | 11 (68.8%)  |
| It is easy to understand when insulin was suspended due to sensor values.                                                | 6.3   | 0.76 | 6      | 4–7   | 23 (100.0%) | 6.3       | 0.93 | 6.5    | 4–7   | 16 (100.0%) |
| When a pump “Suspended by Sensor” event occurs, it is clear whether it has “Suspended before Low” or “Suspended on Low.” | 6     | 0.9  | 6      | 4–7   | 23 (100.0%) | 5.8       | 1.22 | 6      | 4–7   | 16 (100.0%) |
| I feel confident in my insulin pump resuming basal insulin, after the pump is “Suspended by Sensor.”                     | 6.2   | 0.9  | 6      | 4–7   | 23 (100.0%) | 6.4       | 0.72 | 6.5    | 5–7   | 16 (100.0%) |
| It is easy to understand when basal insulin was resumed.                                                                 | 6.5   | 0.67 | 7      | 5–7   | 23 (100.0%) | 6.5       | 0.73 | 7      | 5–7   | 16 (100.0%) |
| It is easy to manually resume basal insulin, after the pump is “Suspended by Sensor.”                                    | 6.5   | 0.67 | 7      | 5–7   | 23 (100.0%) | 6.3       | 1.08 | 7      | 4–7   | 16 (100.0%) |
| This pump system, with the Suspend by Sensor features, fits into my lifestyle.                                           | 6.4   | 1.03 | 7      | 4–7   | 23 (100.0%) | 6.6       | 0.81 | 7      | 4–7   | 16 (100.0%) |
| This pump system, with the Suspend by Sensor features, does not interfere with my daily activities.                      | 6     | 1.26 | 6      | 3–7   | 21 (91.3%)  | 6.6       | 0.62 | 7      | 5–7   | 16 (100.0%) |
| I feel confident using this pump system, with the Suspend by Sensor features, to manage my diabetes.                     | 6.4   | 0.84 | 7      | 5–7   | 23 (100.0%) | 6.6       | 0.5  | 7      | 6–7   | 16 (100.0%) |
| The Suspend by Sensor features provide protection against lows.                                                          | 6.5   | 0.73 | 7      | 5–7   | 23 (100.0%) | 5.9       | 1    | 6      | 4–7   | 16 (100.0%) |
| The Suspend by Sensor features make it easier for me to manage my lows.                                                  | 6.2   | 0.95 | 6      | 4–7   | 23 (100.0%) | 6.3       | 0.68 | 6      | 5–7   | 16 (100.0%) |
| I feel confident that I manage my lows better with the Suspend by Sensor features.                                       | 6.1   | 1.12 | 6      | 3–7   | 22 (95.7%)  | 6.2       | 0.66 | 6      | 5–7   | 16 (100.0%) |
| The Suspend by Sensor features help me feel confident about my daily diabetes management.                                | 6     | 0.85 | 6      | 4–7   | 23 (100.0%) | 6.2       | 0.83 | 6      | 4–7   | 16 (100.0%) |
| I feel this pump system helps me achieve better glucose control.                                                         | 6.2   | 1.03 | 6      | 4–7   | 23 (100.0%) | 6.3       | 1.13 | 7      | 3–7   | 15 (93.8%)  |
| This pump system is easy to use and reduces some of the burden of my daily diabetes management.                          | 6     | 1.15 | 6      | 4–7   | 23 (100.0%) | 6         | 1.03 | 6      | 4–7   | 16 (100.0%) |
| I am satisfied with my experience using this pump system with the Suspend by Sensor features.                            | 6.3   | 1.06 | 7      | 3–7   | 22 (95.7%)  | 6.3       | 0.79 | 6      | 4–7   | 16 (100.0%) |
| I feel protected from lows by using the Suspend before Low feature.                                                      | 6.3   | 0.96 | 7      | 4–7   | 23 (100.0%) | 5.8       | 1.18 | 5.5    | 3–7   | 15 (93.8%)  |
| I feel protected from lows by using the Suspend on Low feature.                                                          | 5.6   | 1    | 6      | 4–7   | 22 (100.0%) | 5.5       | 1.21 | 5      | 3–7   | 15 (93.8%)  |
| I would like to continue using this insulin pump system.                                                                 | 6.5   | 0.99 | 7      | 4–7   | 23 (100.0%) | 6.6       | 0.89 | 7      | 4–7   | 16 (100.0%) |
| I would like to continue using the Suspend before Low feature.                                                           | 6.6   | 0.85 | 7      | 4–7   | 22 (100.0%) | 6.6       | 0.62 | 7      | 5–7   | 16 (100.0%) |
| I would like to continue using the Suspend on Low feature.                                                               | 6     | 1.26 | 7      | 3–7   | 22 (95.7%)  | 6.6       | 0.62 | 7      | 5–7   | 16 (100.0%) |

(continued)

SUPPLEMENTARY TABLE S1. (CONTINUED)

| <i>Question</i>                                                                                                                                                | <i>Adult</i> |           |               |              |             | <i>Pediatric</i> |           |               |              |             |
|----------------------------------------------------------------------------------------------------------------------------------------------------------------|--------------|-----------|---------------|--------------|-------------|------------------|-----------|---------------|--------------|-------------|
|                                                                                                                                                                | <i>Mean</i>  | <i>SD</i> | <i>Median</i> | <i>Range</i> | <i>≥4</i>   | <i>Mean</i>      | <i>SD</i> | <i>Median</i> | <i>Range</i> | <i>≥4</i>   |
| I would recommend this insulin pump system, with the Suspend by Sensor features, to another person with diabetes.                                              | 6.7          | 0.71      | 7             | 5–7          | 23 (100.0%) | 6.8              | 0.58      | 7             | 5–7          | 16 (100.0%) |
| The Suspend before Low feature helps protect against lows during the daytime.                                                                                  | 6.3          | 0.78      | 6.5           | 5–7          | 22 (100.0%) | 6.1              | 0.85      | 6             | 5–7          | 16 (100.0%) |
| The Suspend before Low feature helps protect against lows overnight.                                                                                           | 6.7          | 0.57      | 7             | 5–7          | 22 (100.0%) | 6.4              | 0.72      | 6.5           | 5–7          | 16 (100.0%) |
| The Suspend on Low feature helps protect against lows during the daytime.                                                                                      | 5.9          | 1.04      | 6             | 3–7          | 20 (95.2%)  | 6                | 0.89      | 6             | 5–7          | 16 (100.0%) |
| The Suspend on Low feature helps protect against lows overnight.                                                                                               | 6            | 1.07      | 6             | 3–7          | 20 (95.2%)  | 6.2              | 0.75      | 6             | 5–7          | 16 (100.0%) |
| The Suspend by Sensor features in this pump system makes it easier to manage my lows compared to using my previous pump system without these features.         | 6.5          | 1.04      | 7             | 3–7          | 22 (95.7%)  | 6.4              | 0.89      | 7             | 4–7          | 16 (100.0%) |
| The Suspend by Sensor features in this pump system provide more protection from lows than using my previous pump system without these features.                | 6.5          | 0.99      | 7             | 3–7          | 22 (95.7%)  | 6.4              | 0.73      | 7             | 5–7          | 16 (100.0%) |
| The Suspend by Sensor features in this pump system are more effective in managing my lows than using my previous pump system without these features.           | 6.4          | 1.2       | 7             | 3–7          | 22 (95.7%)  | 6.4              | 0.72      | 6.5           | 5–7          | 16 (100.0%) |
| I am able to better control my glucose levels with this system than with my current pump system without these features.                                        | 6.2          | 1.15      | 7             | 3–7          | 22 (95.7%)  | 6.1              | 0.96      | 6             | 4–7          | 16 (100.0%) |
| I prefer to use this pump system, with the Suspend by Sensor features, to manage my diabetes compared to using my previous pump system without these features. | 6.4          | 1.16      | 7             | 3–7          | 22 (95.7%)  | 6.8              | 0.4       | 7             | 6–7          | 16 (100.0%) |
